# Supplementary material for: A High-Quality Chromosome-Level Genome Assembly of a Snail Cipangopaludina cathayensis (Gastropoda: Viviparidae)
Source: MDPI journal article supplement (doi:10.3390/genes14071365), 2023-06-28
Supplement: s1 [file s1]

Supplementary Tables

Table S1. Statistics for the sequencing data of *Cipangopaludina cathayensis* genome

| Type             | Platform              | Library size (bp) | Raw data(Gb) | Clean data(Gb) | Coverage (×) |
|------------------|-----------------------|-------------------|--------------|----------------|--------------|
| MGI              | MGI DNBSEQ-T7         | 350               | 202.86       | 191.31         | 134.72       |
| Hifi             | PacBio Sequel II      | 15k               | 965          | 64.84          | 43.78        |
| Hi-C             | MGI DNBSEQ-T7         | 350               | 270.03       | 266.94         | 180.24       |
| Illumina RNA-Seq | Illumina NovaSeq-6000 | 350               | 20.58        | 20.18          | 13.63        |

Table S2. Genome assembly results of *Cipangopaludina cathayensis*.

| Mode                    | Total length (bp) | Total number | Total number<br>(≥ 2 kb) | max length (bp) | N50 (bp)   | N90 (bp)   | GC content (%) |
|-------------------------|-------------------|--------------|--------------------------|-----------------|------------|------------|----------------|
| hifiasm                 | 1,493,314,729     | 77           | 77                       | 195,581,417     | 98,494,158 | 22,719,975 | 34.58          |
| hifiasm+purge_haplotigs | 1,481,564,277     | 40           | 40                       | 195,581,417     | 98,494,158 | 24,800,090 | 34.57          |

**Table S3.** BUSCO analysis results of *Cipangopaludina cathayensis* genome.

| Type                                | BUSCOs num | Percentage (%) |
|-------------------------------------|------------|----------------|
| Complete BUSCOs (C)                 | 903        | 94.65          |
| Complete and single-copy BUSCOs (S) | 897        | 94.03          |
| Complete and duplicated BUSCOs (D)  | 6          | 0.63           |
| Fragmented BUSCOs (F)               | 9          | 0.94           |
| Missing BUSCOs (M)                  | 42         | 4.4            |
| Total BUSCO groups searched         | 954        | 100            |

**Table S4.** Statistics of Hi-C assembly results of *Cipangopaludina cathayensis*.

|                              | Sequence length (kb) | Sequence number | Contig N50 (kp) | Scaffold N50 (kp) |
|------------------------------|----------------------|-----------------|-----------------|-------------------|
| Draft genome                 | 1,481,564,277        | 40              | 98,494,158      | 98,494,158        |
| Genome after assembly        | 1,481,416,323        | 11              | 98,494,158      | 195,211,951       |
| Chromosome after assembly    | 1,481,322,579        | 9               | 98,494,158      | 195,211,951       |
| Free sequence after assembly | 93,744               | 2               | 75,396          | 75,396            |

**Table S5.** Statistics of repetitive sequences in *Cipangopaludina cathayensis* genome.

| Type           | Repeat Size (bp) | % of genome |
|----------------|------------------|-------------|
| Trf            | 290,747,731      | 19.62       |
| Repeatmasker   | 139,412,236      | 9.41        |
| Proteinmask    | 55,542,504       | 3.75        |
| <i>De novo</i> | 469,839,051      | 31.71       |
| Total          | 797,589,608      | 53.83       |

**Table S6.** Statistics of transposable elements for *Cipangopaludina cathayensis* genome.

|                          | RepBase TEs |             | TE Proteins |             | De novo     |             | Combined TEs |             |
|--------------------------|-------------|-------------|-------------|-------------|-------------|-------------|--------------|-------------|
|                          | Length (bp) | % in genome | Length (bp) | % in genome | Length (bp) | % in genome | Length (bp)  | % in genome |
| DNA Transposable element | 87,289,494  | 5.89        | 15,304,806  | 1.03        | 58,865,912  | 3.97        | 130,751,192  | 8.83        |
| LINE                     | 35,206,647  | 2.38        | 23,300,781  | 1.57        | 33,482,464  | 2.26        | 60,265,603   | 4.07        |
| SINE                     | 181,402     | 0.01        | 0           | 0.00        | 1,344,830   | 0.09        | 1,448,013    | 0.10        |
| LTR                      | 31,807,761  | 2.15        | 16,949,298  | 1.14        | 35,426,263  | 2.39        | 65,958,915   | 4.45        |
| Satellite                | 5,198,483   | 0.35        | 0           | 0.00        | 999,543     | 0.07        | 6,173,918    | 0.42        |
| Simple_repeat            | 0           | 0.00        | 0           | 0.00        | 167,473     | 0.01        | 167,473      | 0.01        |
| Other                    | 21,420      | 0.00        | 0           | 0.00        | 0           | 0.00        | 21,420       | 0.00        |
| Unknown                  | 1,388,317   | 0.09        | 0           | 0.00        | 345,569,012 | 23.32       | 346,394,572  | 23.38       |
| Total                    | 139,412,236 | 9.41        | 55,542,504  | 3.75        | 469,839,051 | 31.71       | 578,440,097  | 39.04       |

**Table S7.** Statistics of gene predictions in *Cipangopaludina cathayensis* genome.

| Gene set                            | Protein<br>coding gene<br>number | Average gene<br>length (bp) | Average CDS<br>length (bp) | Average exon<br>number per<br>gene | Average exon<br>length (bp) | Average intron<br>length (bp) |
|-------------------------------------|----------------------------------|-----------------------------|----------------------------|------------------------------------|-----------------------------|-------------------------------|
| denovo/Genscan                      | 39,532                           | 22,860                      | 1,244                      | 5.51                               | 225.65                      | 4,790                         |
| denovo/AUGUSTUS                     | 63,075                           | 10,221                      | 913.38                     | 4.53                               | 201.67                      | 2,637                         |
| homo/ <i>Aplysia californica</i>    | 15,502                           | 22,814                      | 1,145                      | 6.26                               | 182.88                      | 4,117                         |
| homo/ <i>Biomphalaria glabrata</i>  | 17,780                           | 19,394                      | 1,001                      | 5.36                               | 186.56                      | 4,214                         |
| homo/ <i>Haliotis rubra</i>         | 17,907                           | 24,757                      | 1,196                      | 6.42                               | 186.42                      | 4,351                         |
| homo/ <i>Plakobranhus ocellatus</i> | 26,307                           | 12,055                      | 856.32                     | 4.00                               | 214.02                      | 3,731                         |
| trans.orf/RNAseq                    | 10,412                           | 41,180                      | 1,823                      | 10.83                              | 481.34                      | 3,659                         |
| BUSCO                               | 4,936                            | 26,825                      | 1,719                      | 12.35                              | 139.16                      | 2,211                         |
| MAKER                               | 20,503                           | 28,936                      | 1,290                      | 8.10                               | 359.12                      | 3,667                         |
| HiCESAP                             | 22,702                           | 25,375                      | 1,533                      | 8.24                               | 351.31                      | 3,105                         |

**Table S8.** Summary of functional annotations for predicted genes.

| Annotated number of predicted genes | Number | Percent (%) |
|-------------------------------------|--------|-------------|
| InterPro                            | 15,409 | 67.88       |
| GO                                  | 11,056 | 48.70       |
| KEGG_ALL                            | 15,599 | 68.71       |
| KEGG_KO                             | 9,729  | 42.86       |
| Swissprot                           | 11,875 | 52.31       |
| TrEMBL                              | 17,649 | 77.74       |
| TF                                  | 1,413  | 6.22        |
| Pfam                                | 14,419 | 63.51       |
| NR                                  | 17,966 | 79.14       |
| KOG                                 | 11,335 | 49.93       |
| All annotated                       | 18,576 | 81.83       |
| Unannotated                         | 4,126  | 18.17       |

**Table S9.** Statistics of none-coding RNA annotation of *Cipangopaludina cathayensis* genome.

| Type  |          | Copy | Average length (bp) | Total length (bp) | % of genome |
|-------|----------|------|---------------------|-------------------|-------------|
| miRNA |          | 68   | 87                  | 5,946             | 0.000401    |
| tRNA  |          | 208  | 76                  | 15,764            | 0.001064    |
| rRNA  | rRNA     | 135  | 207                 | 27,932            | 0.001885    |
|       | 18S      | 8    | 1,539               | 12,313            | 0.000831    |
|       | 28S      | 7    | 150                 | 1,050             | 0.000071    |
|       | 5.8S     | 7    | 154                 | 1,078             | 0.000073    |
|       | 5S       | 113  | 119                 | 13,491            | 0.000911    |
| snRNA | snRNA    | 128  | 145                 | 18,518            | 0.001250    |
|       | CD-box   | 51   | 103                 | 5,263             | 0.000355    |
|       | HACA-box | 16   | 232                 | 3,704             | 0.000250    |
|       | splicing | 60   | 157                 | 9,425             | 0.000636    |
|       | scaRNA   | 1    | 126                 | 126               | 0.000009    |

**Table S10.** BUSCO analysis results of *Cipangopaludina cathayensis* genome annotation.

| Type                        | Annotation |                |
|-----------------------------|------------|----------------|
|                             | Proteins   | Percentage (%) |
| Complete BUSCOs             | 908        | 95.2           |
| Complete Single-Copy BUSCOs | 904        | 94.8           |
| Complete Duplicated BUSCOs  | 4          | 0.4            |
| Fragmented BUSCOs           | 12         | 1.3            |
| Missing BUSCOs              | 34         | 3.5            |
| Total BUSCO groups searched | 954        | 100            |



**Table S11.** Statistical results of gene family clustering.

| Species                            | Genes<br>number | Unclustered<br>genes | Genes<br>in<br>families | Family<br>number | Unique<br>families | Unique<br>family<br>genes | Common<br>families | Common<br>family<br>genes | Single<br>copy<br>genes | Average<br>gene<br>number<br>per family |
|------------------------------------|-----------------|----------------------|-------------------------|------------------|--------------------|---------------------------|--------------------|---------------------------|-------------------------|-----------------------------------------|
| <i>Cipangopaludina cathayensis</i> | 22,702          | 3,386                | 19,316                  | 15,083           | 191                | 565                       | 453                | 794                       | 92                      | 1.281                                   |
| <i>Achatina fulica</i>             | 23,726          | 4,352                | 19,374                  | 12,653           | 386                | 1,468                     | 453                | 905                       | 92                      | 1.531                                   |
| <i>Bellamya purificata</i>         | 21,476          | 3,481                | 17,995                  | 14,934           | 114                | 326                       | 453                | 770                       | 92                      | 1.205                                   |
| <i>Biomphalaria glabrata</i>       | 25,539          | 6,028                | 19,511                  | 13,419           | 835                | 2,821                     | 453                | 787                       | 92                      | 1.454                                   |
| <i>Crassostrea gigas</i>           | 31,371          | 3,353                | 28,018                  | 13,844           | 1,431              | 7,347                     | 453                | 991                       | 92                      | 2.024                                   |
| <i>Elysia chlorotica</i>           | 23,871          | 6,764                | 17,107                  | 13,065           | 454                | 1,464                     | 453                | 690                       | 92                      | 1.309                                   |
| <i>Lingula anatina</i>             | 27,055          | 3,230                | 23,825                  | 11,686           | 1,571              | 6,407                     | 453                | 1,102                     | 92                      | 2.039                                   |
| <i>Lottia gigantea</i>             | 23,818          | 4,390                | 19,428                  | 12,714           | 623                | 3,344                     | 453                | 849                       | 92                      | 1.528                                   |
| <i>Mytilus galloprovincialis</i>   | 16,208          | 2,636                | 13,572                  | 3,398            | 1,130              | 5,692                     | 453                | 675                       | 92                      | 3.994                                   |
| <i>Patinopecten yessoensis</i>     | 24,521          | 3,801                | 20,720                  | 13,756           | 807                | 2,760                     | 453                | 922                       | 92                      | 1.506                                   |
| <i>Pomacea canaliculata</i>        | 21,131          | 2,262                | 18,869                  | 12,821           | 371                | 1,877                     | 453                | 764                       | 92                      | 1.472                                   |

**Table S12.** Comparison of the sequencing data between *Cipangopaludina cathayensis* and *Bellamya purificata*

| Species               | Genome size(Gb) | N50(Gb) | Repeat Size (bp) | GC content (%) |
|-----------------------|-----------------|---------|------------------|----------------|
| <i>C. cathayensis</i> | 1.48Gb          | 93.49Mb | 760.649Mb        | 34.57          |
| <i>B. purificata</i>  | 1.01Gb          | 45.14Mb | 482.49 Mb        | 34.52          |

**Table S13.** All DEGs were mapped to 83 KEGG pathways, and the number of unigenes in different pathways ranged from 1 to 42. [\[xlsx\]](#)

**Table S14.** List of positive selective genes in *Cipangopaludina cathayensis* (FDR <0.05).

| ID      | Description                                                             | GeneID       | Gene name | p value     | p.adjust    | GeneRatio | BgRatio  |
|---------|-------------------------------------------------------------------------|--------------|-----------|-------------|-------------|-----------|----------|
| ko00230 | Purine metabolism                                                       | Cca0233930.1 | GART      | 0.144192397 | 0.144192397 | 1/5       | 176/5742 |
| ko01200 | Carbon metabolism                                                       | Cca0242360.1 | RPE       | 0.086558561 | 0.094427521 | 1/5       | 103/5742 |
| ko04550 | Signaling pathways regulating pluripotency of stem cells                | Cca0099870.1 | JARID2    | 0.078427569 | 0.094113082 | 1/5       | 93/5742  |
| ko01230 | Biosynthesis of amino acids                                             | Cca0242360.1 | RPE       | 0.057015717 | 0.076020956 | 1/5       | 67/5742  |
| ko01523 | Antifolate resistance                                                   | Cca0233930.1 | GART      | 0.043642637 | 0.065463956 | 1/5       | 51/5742  |
| ko00310 | Lysine degradation                                                      | Cca0048500.1 | kmt5a     | 0.041960391 | 0.065463956 | 1/5       | 49/5742  |
| ko00532 | Glycosaminoglycan biosynthesis - chondroitin sulfate / dermatan sulfate | Cca0234620.1 | B3GALT6   | 0.027565497 | 0.055130995 | 1/5       | 32/5742  |
| ko00040 | Pentose and glucuronate interconversions                                | Cca0242360.1 | RPE       | 0.02415345  | 0.055130995 | 1/5       | 28/5742  |
| ko00030 | Pentose phosphate pathway                                               | Cca0242360.1 | RPE       | 0.017300621 | 0.051901864 | 1/5       | 20/5742  |
| ko00534 | Glycosaminoglycan biosynthesis - heparan sulfate / heparin              | Cca0234620.1 | B3GALT6   | 0.015581413 | 0.051901864 | 1/5       | 18/5742  |
| ko00670 | One carbon pool by folate                                               | Cca0233930.1 | GART      | 0.051901864 | 0.051901864 | 1/5       | 17/5742  |
| ko00710 | Carbon fixation in photosynthetic organisms                             | Cca0242360.1 | RPE       | 0.051901864 | 0.051901864 | 1/5       | 17/5742  |
